# Supplementary material
Source: publisher site journal article supplement (https://www.dovepress.com/article/351976)
Supplement: Supplementary file 1 [file get_supplementary_file.php]

## Supplementary Figures

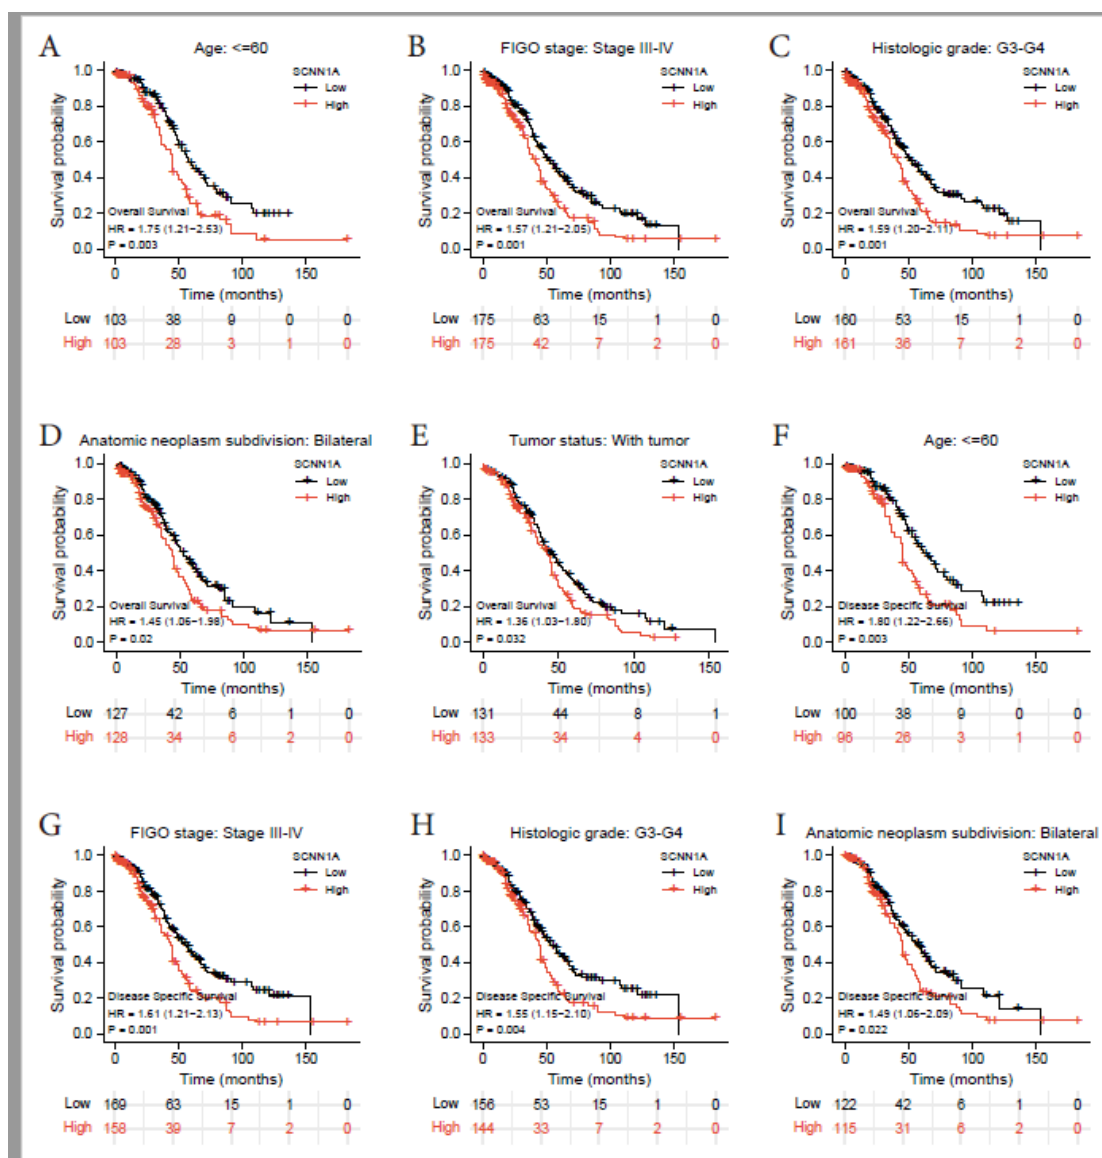

Supplementary Figure 1 Kaplan-Meier survival curves of high- and low- *SCNN1A* expression in different subgroups of ovarian cancer patients.

(A-E) Overall survival curves of age( $\leq 60$ ), stage III-IV, grade G3-G4, anatomic neoplasm subdivision(bilateral), tumor status(with tumor) subgroups between *SCNN1A*-high and -low patients with OV. (F-I) Disease specific survival curves of age( $\leq 60$ ), stage III-IV, grade G3-G4, anatomic neoplasm subdivision(bilateral) subgroups between *SCNN1A*-high and -low patients with OV.

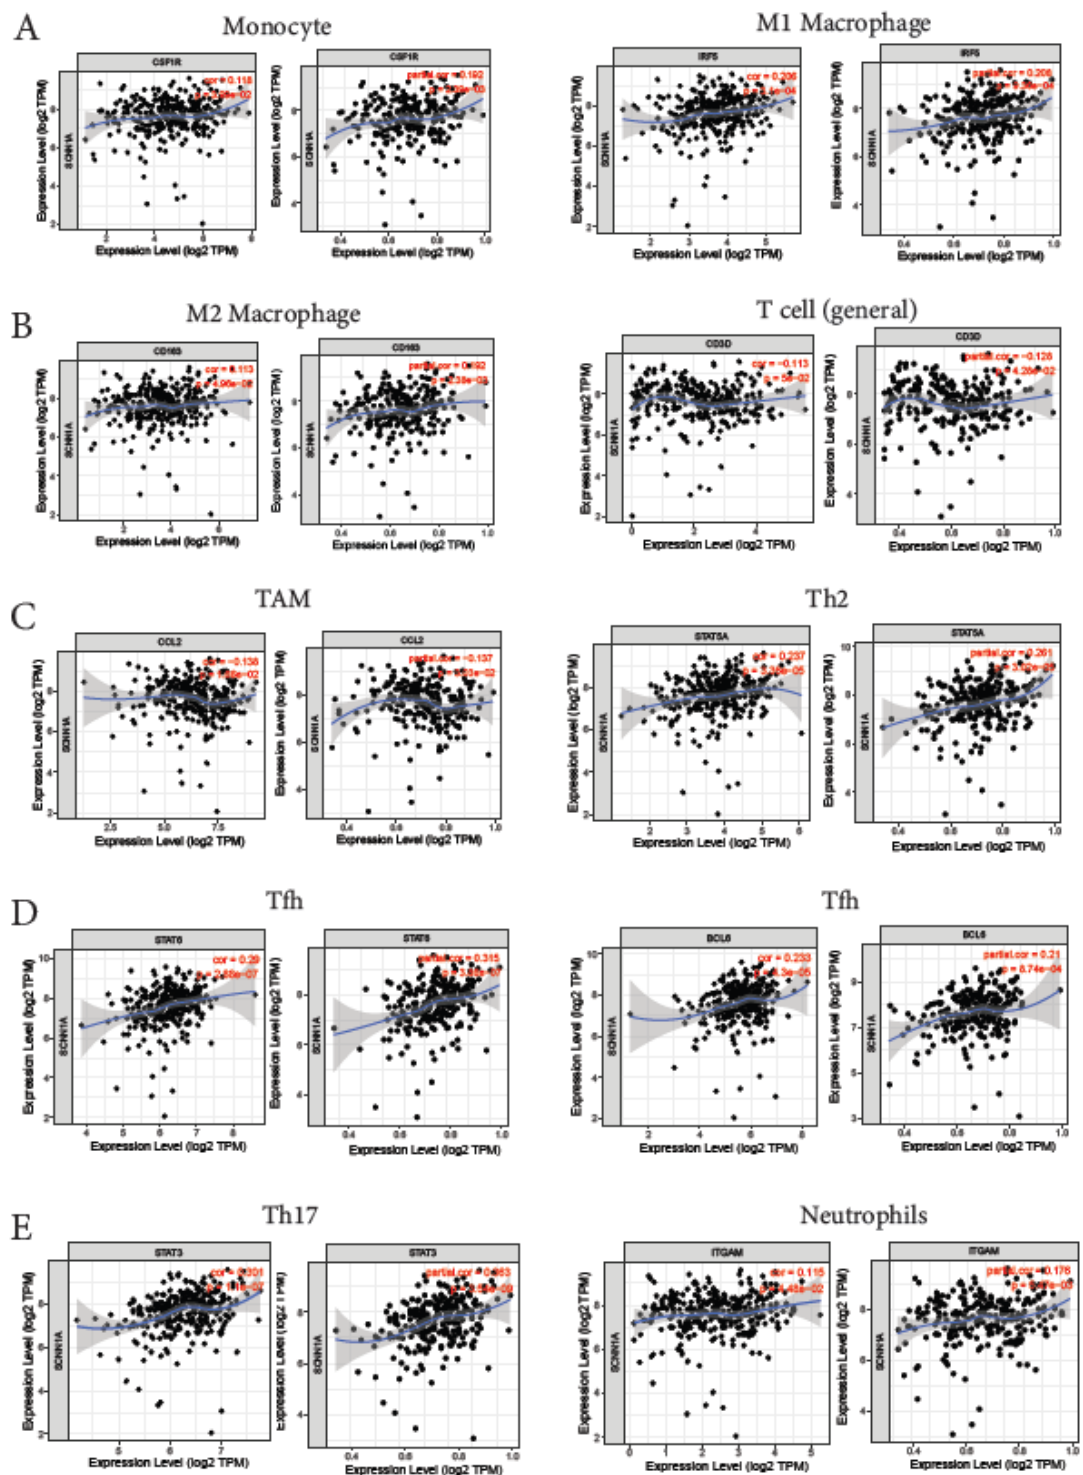

Supplementary Figure 2 Correlation analysis between *SCNN1A* expression and immunological marker set in ovarian cancer. (A-E) Scatterplots of correlations between *SCNN1A* expression and gene markers of immune cells. Markers include *CSF1R*(*CD115*) of monocyte, *IRF5* of M1 Macrophage, *CD163* of M2 Macrophage, *CD3D* of T cell(general), *CCL2* of TAM, *STAT5A* of

Th2, *STAT6* and *BCL6* of Tfh, *STAT3* of Th17, *ITGAM(CD11b)* of neutrophils. TAM, tumor-associated-macrophages.  $P < 0.05$  is considered as significant.

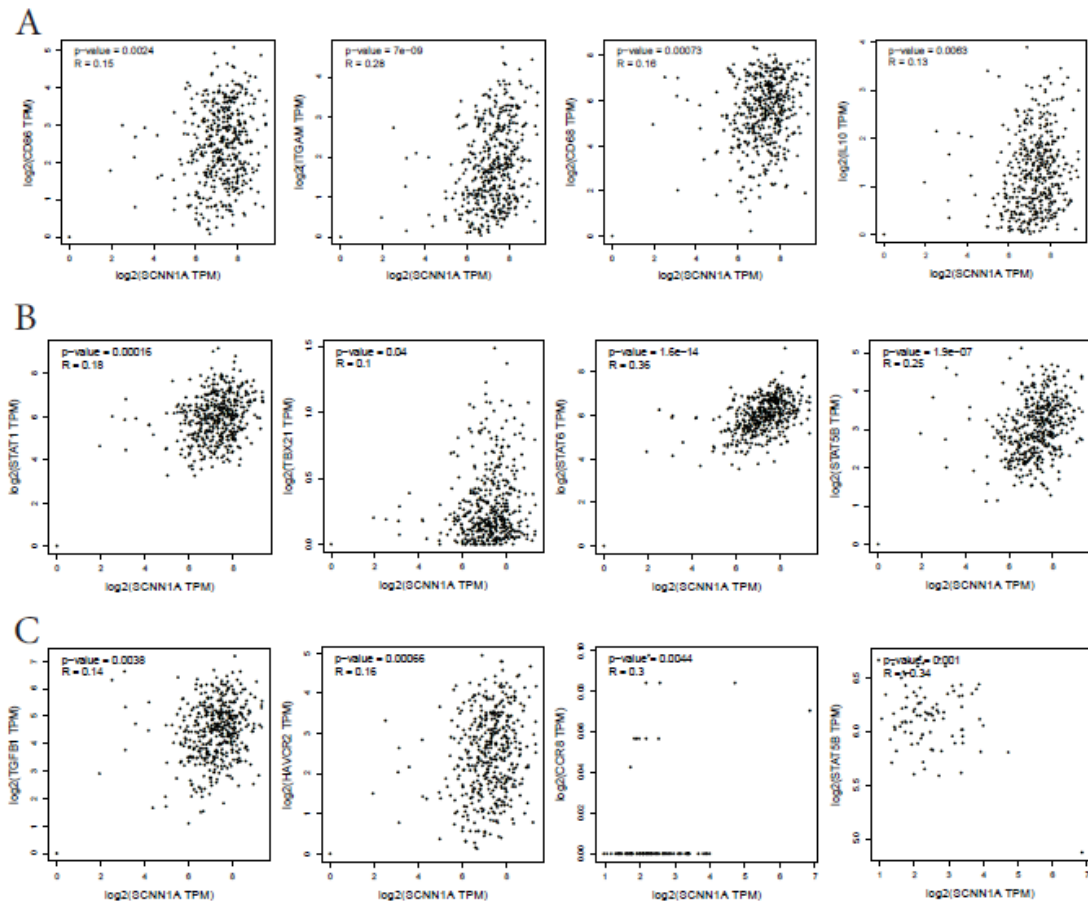

Supplementary Figure 3

Correlation analysis between *SCNN1A* and marker genes of immune cells in GEPIA. Markers include *CD86* of monocyte, *ITGAM(CD11b)* of neutrophils, *CD68* and *IL-10* of TAM, *STAT1* and *TBX21(T-bet)* of Th1, *STAT6* of Th2, *CCR8*, *STAT5B* and *TGF-β(TGFB1)* of Treg, *TIM-3(HAVCR2)* of T cell exhaustion. TAM, tumor-associated-macrophages.  $P < 0.05$  is considered as significant.
